# Supplementary material for: Molecular Comparison of Imatinib-Naïve and Resistant Gastrointestinal Stromal Tumors: Differentially Expressed microRNAs and mRNAs
Source: MDPI journal article supplement (doi:10.3390/cancers11060882), 2019-06-24
Supplement: s1 [file s1]

# Supplementary Table 5

|                                                                                     |                                   |                                                                                       |                                                                                                                                                                                                                                 |
|-------------------------------------------------------------------------------------|-----------------------------------|---------------------------------------------------------------------------------------|---------------------------------------------------------------------------------------------------------------------------------------------------------------------------------------------------------------------------------|
| 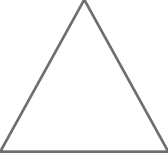   | Phosphatase                       |    | Activation, causation, expression, localization, membership, modification, molecular cleavage, phosphorylation, protein-DNA interactions, protein-RNA interactions, regulation of binding transcription                         |
|    | Ligand-dependent Nuclear Receptor |    | Chemical-chemical interactions, chemical-protein interactions, corrolation, protein-protein interactions, RNA-RNA interactions: non targeting interactions                                                                      |
|    | Mature microRNA                   |    | Indirect interactions (activation, causation, expression, localization, membership, modification, molecular cleavage, phosphorylation, protein-DNA interactions, protein-RNA interactions, regulation of binding transcription) |
|    | Complex/Group/Other               |    | Indirect interactions (inhibits and acts on)                                                                                                                                                                                    |
|    | Enzyme                            |    | Increased expression                                                                                                                                                                                                            |
|  | Kinase                            |  | Decreased expression                                                                                                                                                                                                            |
|  | Transcription Regulator           |                                                                                       |                                                                                                                                                                                                                                 |
|  | Complex/Group                     |                                                                                       |                                                                                                                                                                                                                                 |
|  | Growth factor                     |                                                                                       |                                                                                                                                                                                                                                 |
|  | MiRNAs                            |                                                                                       |                                                                                                                                                                                                                                 |
