# Supplementary figures and images for: Molecular Comparison of Imatinib-Naïve and Resistant Gastrointestinal Stromal Tumors: Differentially Expressed microRNAs and mRNAs
Source: MDPI journal article supplement (doi:10.3390/cancers11060882), 2019-06-24

Supplementary Figure 3A

**miR-30c-5p**

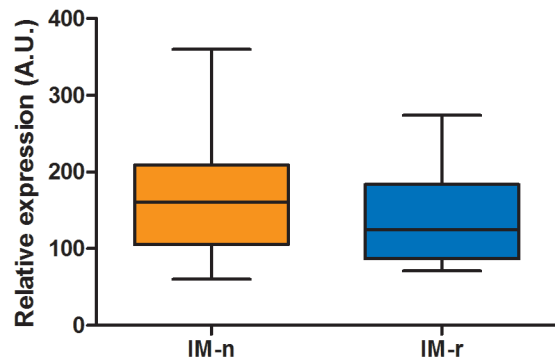

**miR-92a-3p**

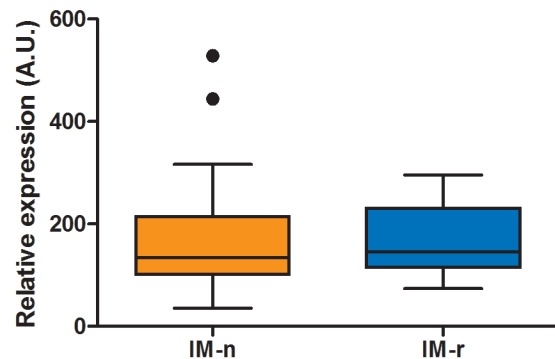

**miR-99a-5p**

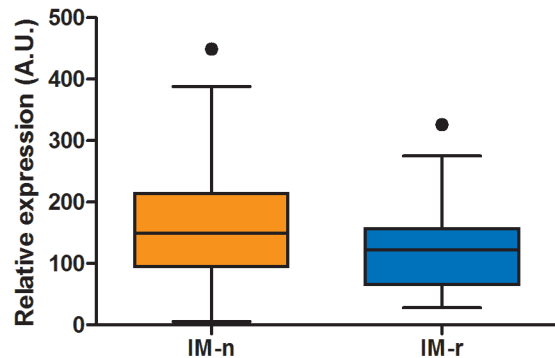

**miR-101-3p**

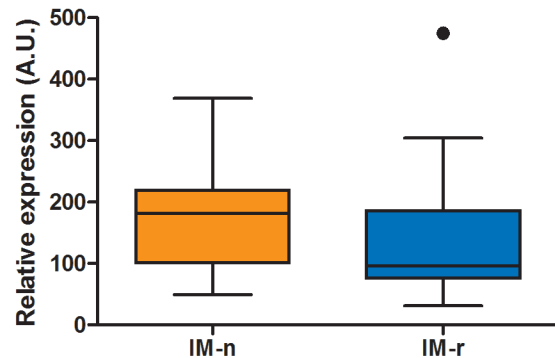

Supplement: s1 [file s1]

Supplementary Figure 2

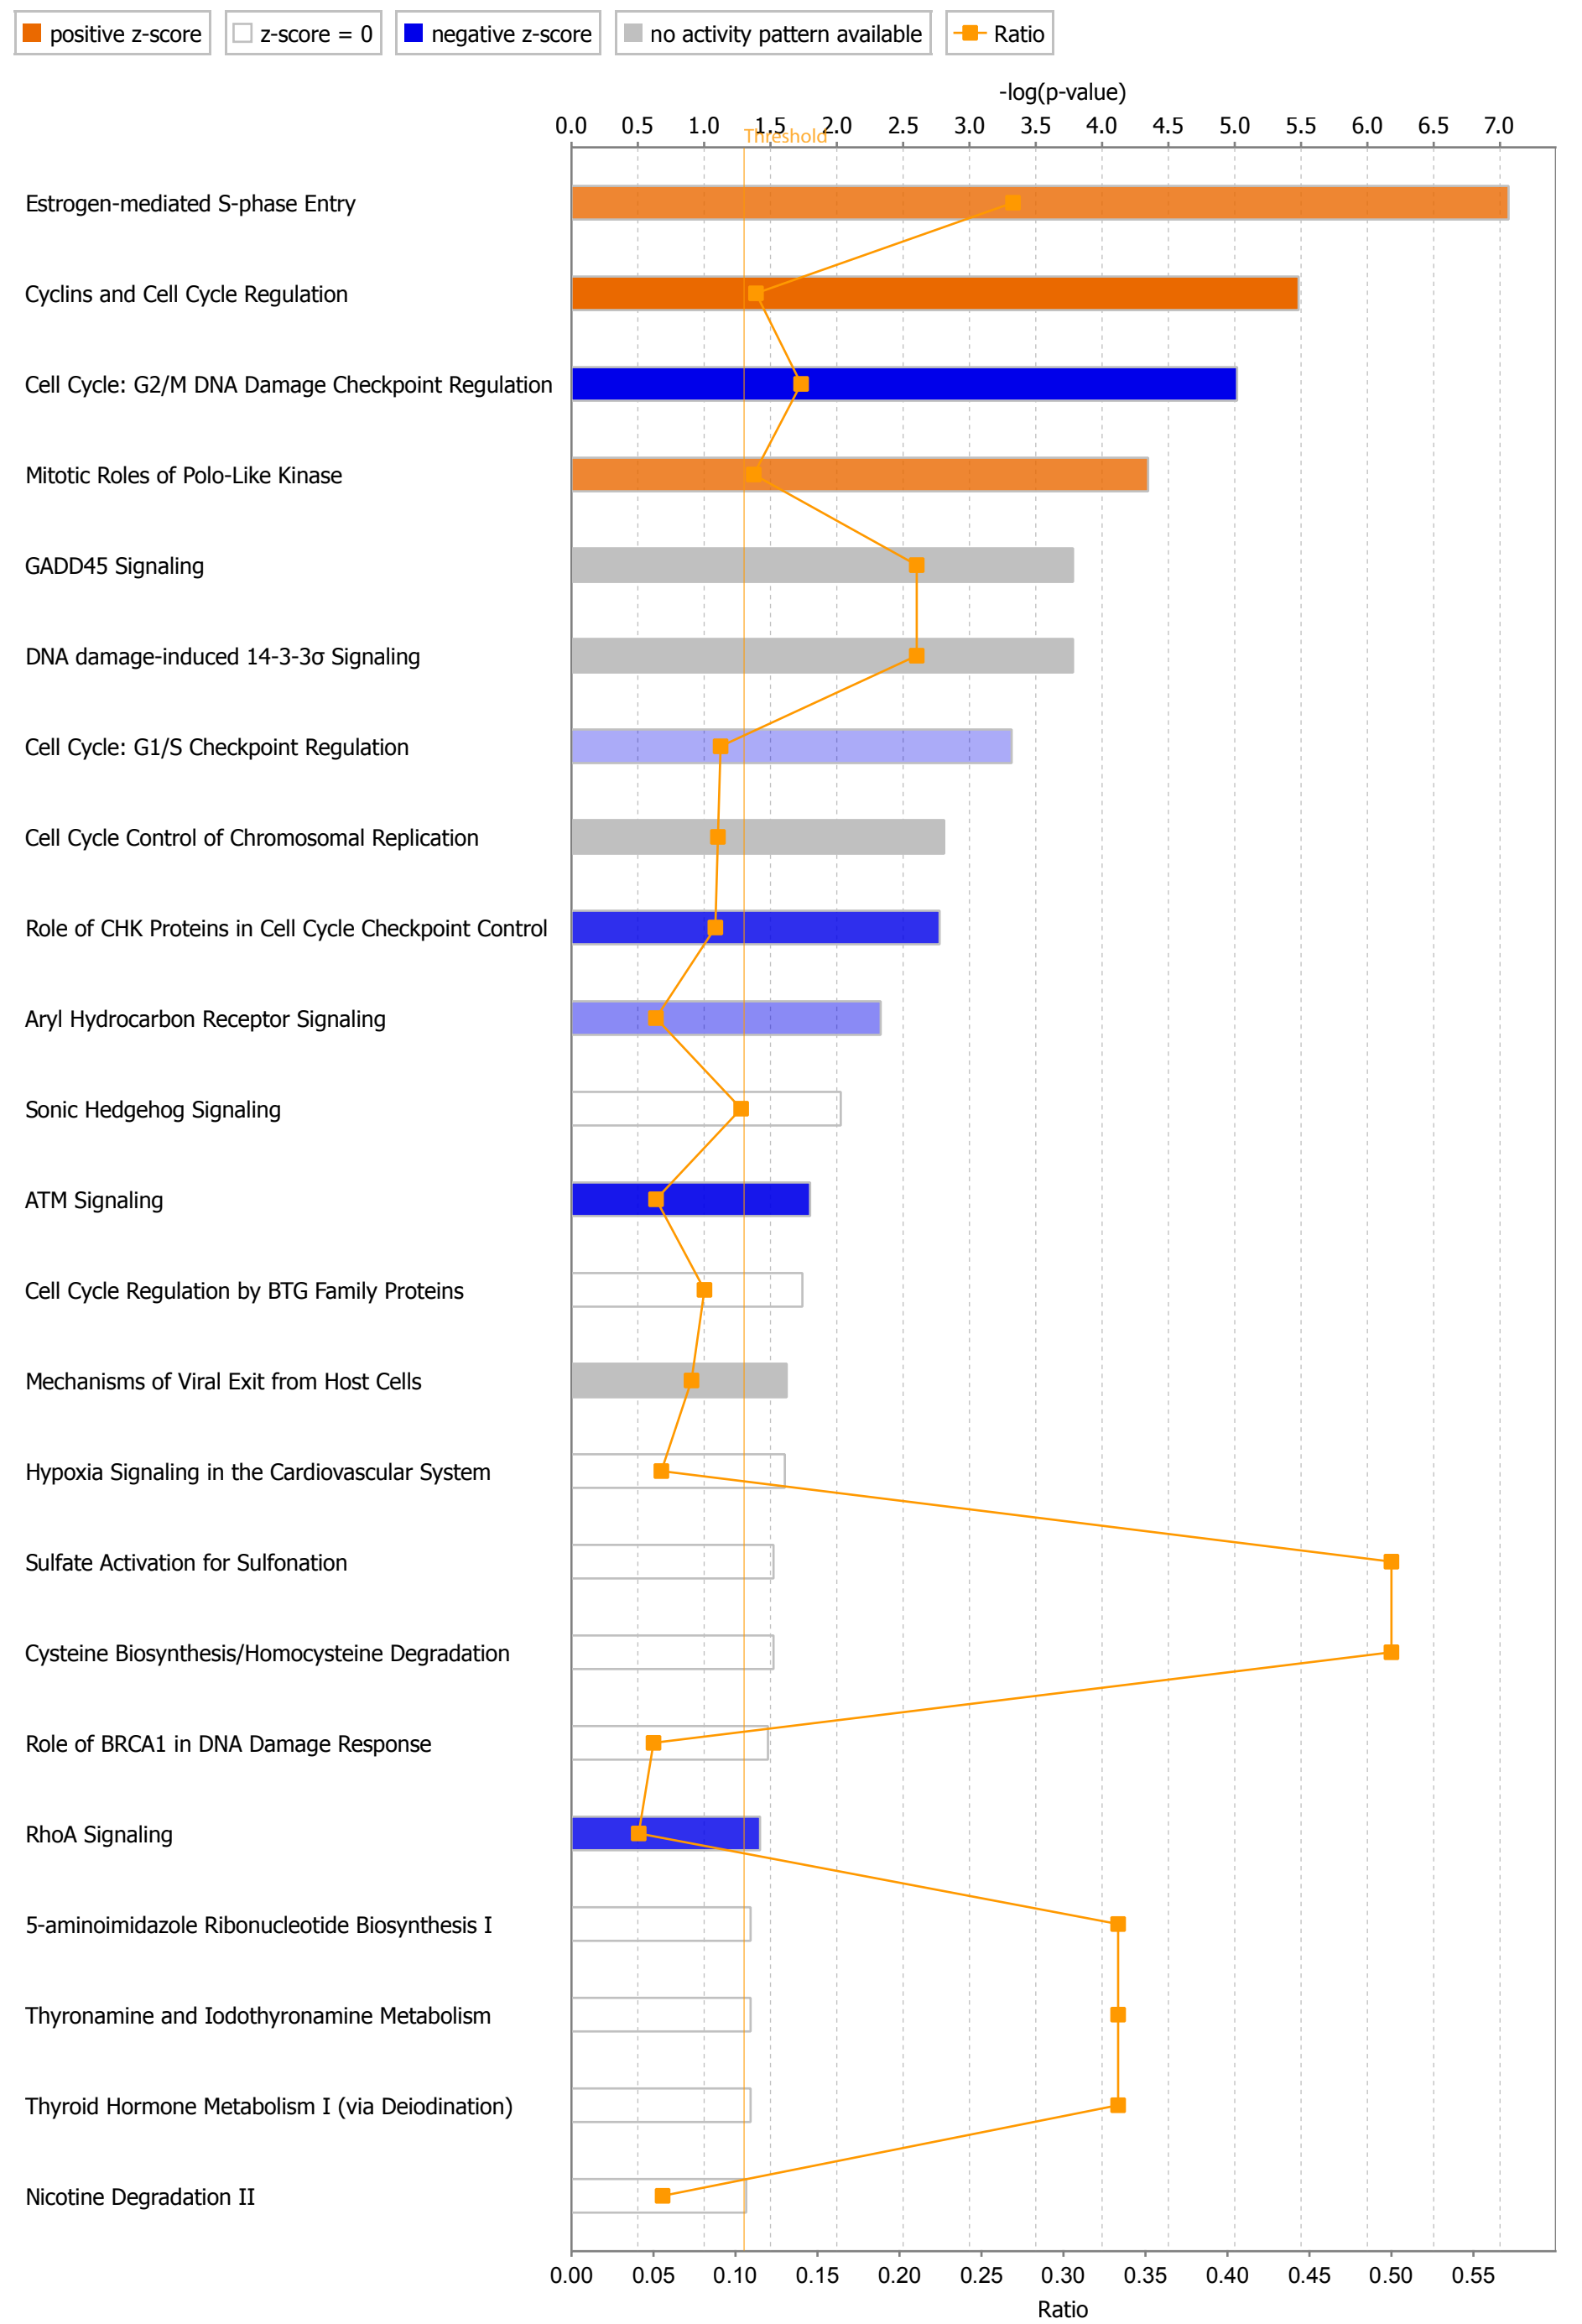

Supplement: s1 [file s1]

Supplementary Figure 1

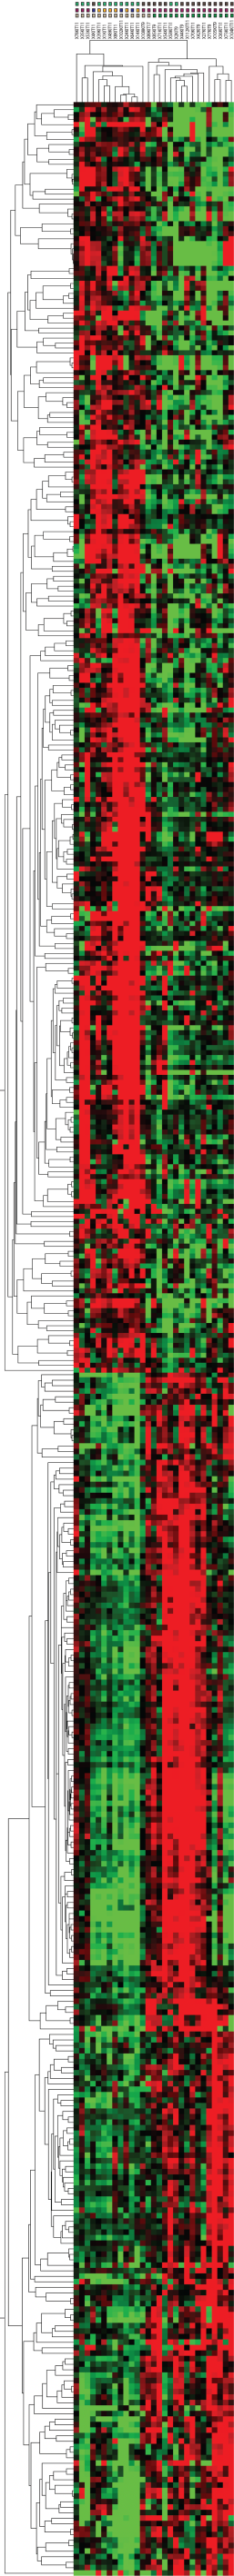

Supplement: s1 [file s1]

Supplementary Figure 3B **AURKA**

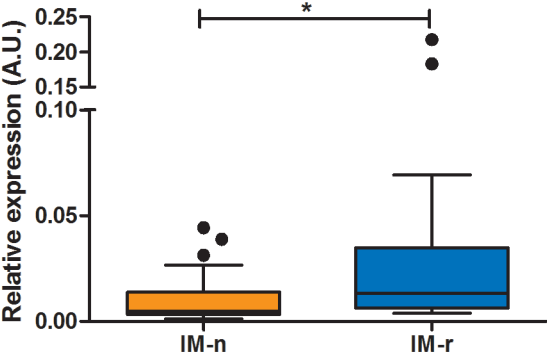

**AURKB**

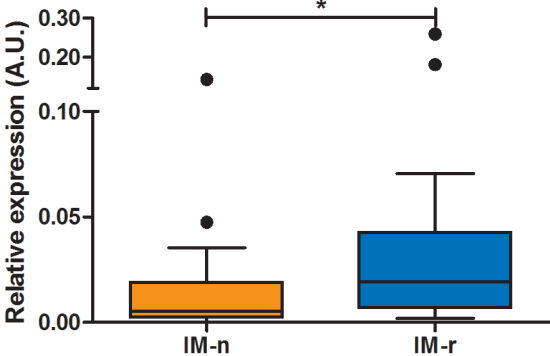

**CCND2**

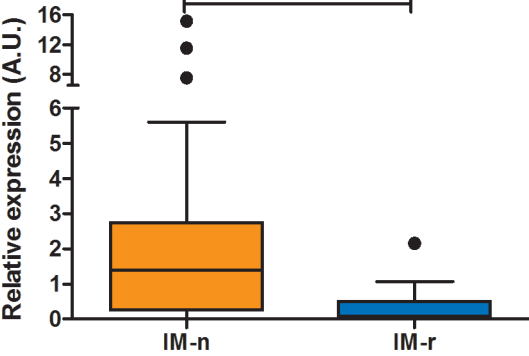

**CCNE2**

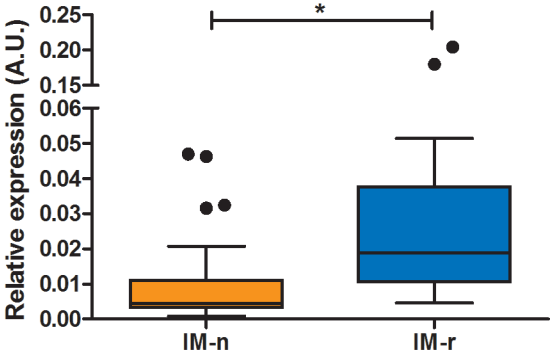

**CDK1**

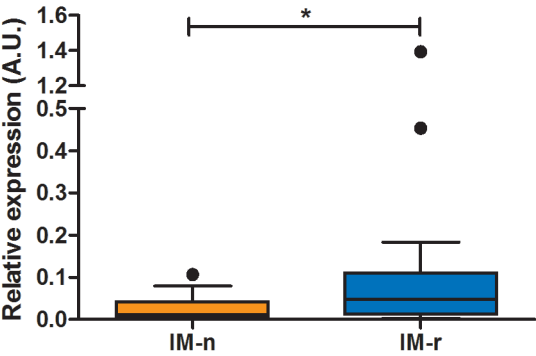

**CDKN1C**

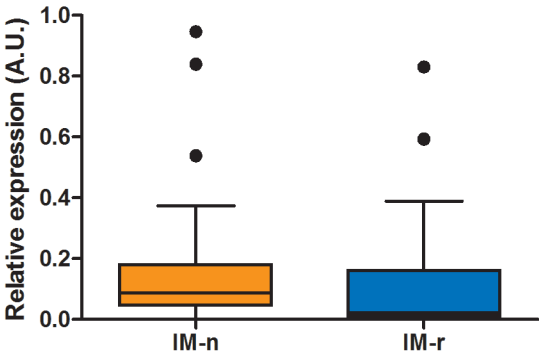

**E2F7**

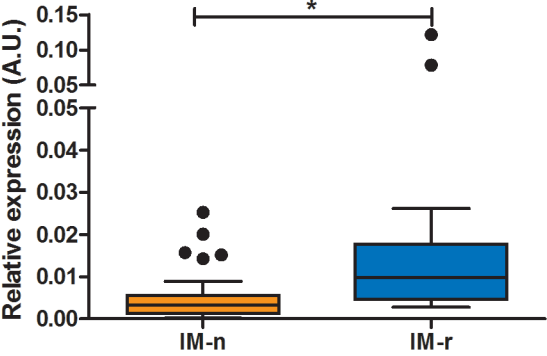

**FOXM1**

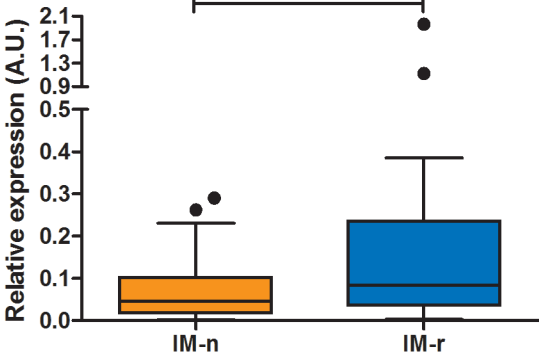

Supplement: s1 [file s1]
